# Supplementary material
Source: MDPI journal article supplement (https://www.mdpi.com/2077-0472/12/5/687)
Supplement: s1 [file s1]

**Table S1** Floristic list and characteristics of plants found in association with *S. marianum* in severely and partially invaded sites

| S.NO | Plant Name                                                       | LD | SP | Family          | M/D | H | S             | RLF | LSC |
|------|------------------------------------------------------------------|----|----|-----------------|-----|---|---------------|-----|-----|
| 1    | <i>Silybum marianum</i> (L.) Gaernt                              | P  | Cu | Asteraceae      | D   | S | Pluriregional | Ch  | Mes |
| 2    | <i>Amaranthus viridis</i> L.                                     | A  | I  | Amaranthaceae   | D   | H | Uniregional   | Th  | Mic |
| 3    | <i>Artemisia scoparia</i> Waldst. & Kit.                         | P  | NV | Asteraceae      | D   | H | Pluriregional | Ch  | Mic |
| 4    | <i>Asphodelus tenuifolius</i> Cav.                               | P  | I  | asphodelaceae   | M   | S | Biregional    | Ch  | L   |
| 5    | <i>Avena fatua</i> L.                                            | A  | W  | Poaceae         | D   | H | Biregional    | Th  | N   |
| 6    | <i>Avena sativa</i> L.                                           | A  | Cu | Poaceae         | D   | H | Pluriregional | Ch  | L   |
| 7    | <i>Cannabis sativa</i> L.                                        | A  | I  | Cannabaceae     | D   | H | Uniregional   | Th  | Mic |
| 8    | <i>Carthamus oxyacantha</i> M.Bieb.                              | A  | NV | Asteraceae      | D   | H | Uniregional   | Ch  | Mes |
| 9    | <i>Chenopodium murale</i> L.                                     | A  | W  | armentheaceae   | M   | S | Cosmopolitan  | Th  | N   |
| 10   | <i>Cortaderia selloana</i> (Schult. & Schult.f.) Asch. & Graebn. | A  | W  | Poaceae         | M   | H | Bioregional   | P   | Mes |
| 11   | <i>Dodonaea viscosa</i> Jacq.                                    | P  | NV | Sapindaceae     | D   | S | Uniregional   | P   | Mic |
| 12   | <i>Euphorbia helioscopia</i> L.                                  | A  | Cu | Euphoorbiaceae  | M   | S | Pluriregional | P   | L   |
| 13   | <i>Fumaria indica</i> Hausskn.                                   | A  | NU | papavaraceae    | M   | S | Uniregional   | P   | Mes |
| 14   | <i>Hypochaeris radicata</i> L.                                   | A  | Cu | Asteraceae      | M   | H | Bioregional   | Ch  | N   |
| 15   | <i>Lathyrus sativus</i> L.                                       | P  | W  | Fabaceae        | D   | H | Pluriregional | Ch  | N   |
| 16   | <i>Melilotus indicus</i> (L.) All.                               | A  | Cu | Fabaceae        | M   | H | Pluriregional | Ch  | N   |
| 17   | <i>Parthenium hysterophorus</i> L.                               | A  | I  | Asteraceae      | D   | H | Uniregional   | Th  | Mic |
| 18   | <i>Phalaris caroliniana</i> Walter                               | A  | NU | Poaceae         | M   | S | Uniregional   | Th  | L   |
| 19   | <i>Phalaris minor</i> Retz.                                      | P  | Cu | Poaceae         | D   | H | Pluriregional | Ch  | L   |
| 20   | <i>Solanum nigrum</i> L.                                         | A  | W  | Solenceae       | M   | S | Pluriregional | Th  | N   |
| 21   | <i>Spergula arvensis</i> L.                                      | A  | W  | Caryophyleaceae | D   | H | Pluriregional | Th  | Mic |
| 22   | <i>Stylosanthes humilis</i> Kunth                                | A  | W  | Fabaceae        | D   | H | Pluriregional | Th  | L   |

Note: LD, Life duration; P, Perennial; A, Annual; SP, Status of plant; Cu, Cultivated; I, Invasive; NV, Native; W, Wild; NU, Naturalized; M/D, Monocot/Dicot; S, Status; RLF, Raunkiaer plant life-form; Ch, Chamaephytes; Th, Therophytes; P, Phanerophytes; LSC, Leaf size class; L, Leptophylls; N, Nanophylls; Mic, Microphylls; Mes, Mesophylls.
